# Supplementary material for: Gastrointestinal Tolerance of an Infant Formula Manufactured from Extensively Hydrolysed Protein in Healthy Term Infants
Source: MDPI journal article supplement (doi:10.3390/nu15214674), 2023-11-04
Supplement: s1 [file s1]

## Supplementary Materials (Otten et al. Nutrients 2023)

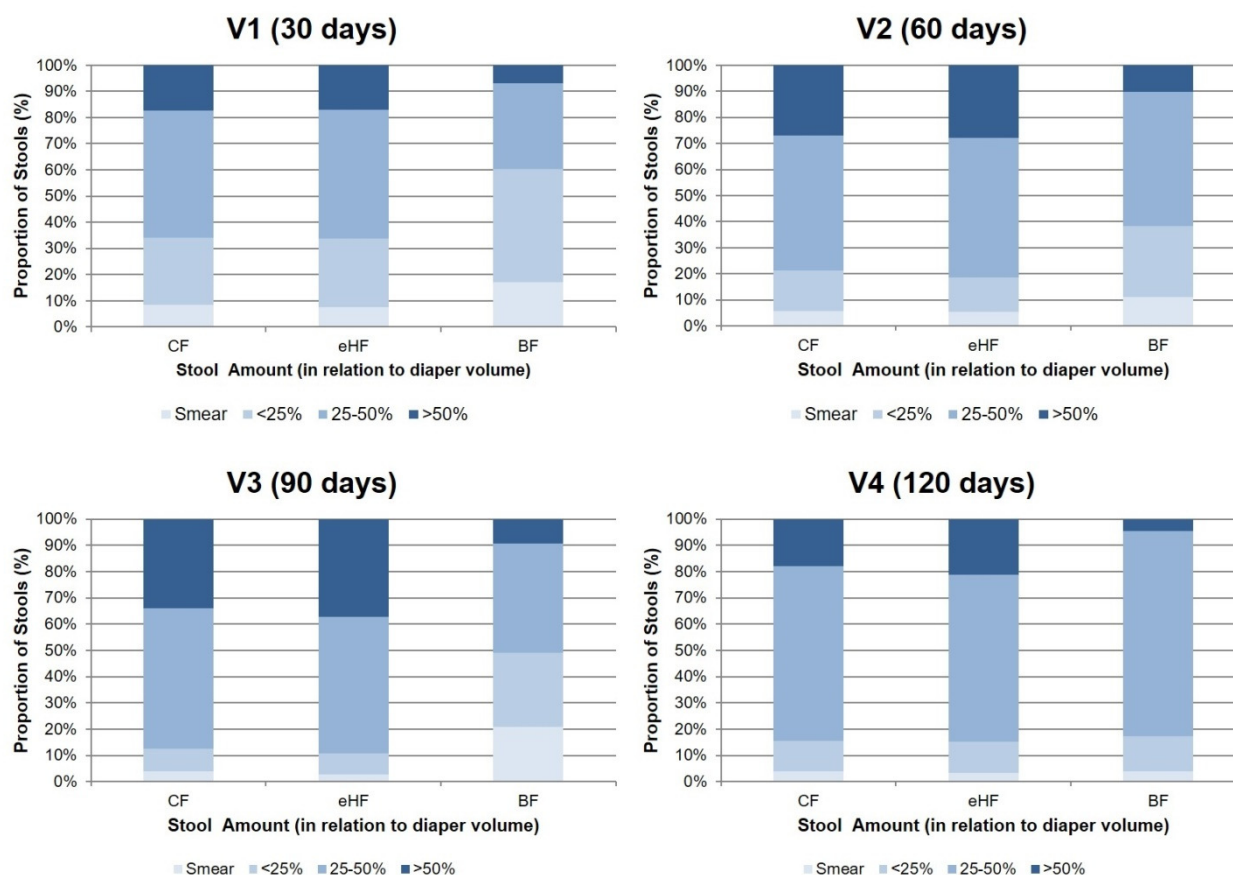

Figure S1. Proportion of stool amount (in relation to diaper volume) per diaper from 3-day diary (PPS).

Missing values in eHF: V1:  $n = 2$ ; V4:  $n = 1$ .

Missing values in CF: V3:  $n = 1$ .

BF: breastfed reference group; CF: control formula; eHF: infant formula manufactured from extensively hydrolysed whey protein; PPS: per protocol set; V: visit.

Table S1. Selected individual items from the IGSQ (PPS)

| Visit                                                                                                                                  | Age at Visit<br>(Days) |                                | eHF<br>(n = 149) | CF<br>(n = 148) | BF<br>(n = 41) |
|----------------------------------------------------------------------------------------------------------------------------------------|------------------------|--------------------------------|------------------|-----------------|----------------|
| No. 3: Frequency of spitting up: “Thinking about a usual day in the past week, how many times did milk come out of your baby's mouth?” |                        |                                |                  |                 |                |
| 1                                                                                                                                      | 30                     | 0 times in a usual day         | 77 (51.7)        | 79 (53.4)       | 21 (51.2)      |
|                                                                                                                                        |                        | 1 time in a usual day          | 35 (23.5)        | 36 (24.3)       | 11 (26.8)      |
|                                                                                                                                        |                        | 2 to 3 times in a usual day    | 32 (21.5)        | 31 (20.9)       | 7 (17.1)       |
|                                                                                                                                        |                        | 4 to 6 times in a usual day    | 4 (2.7)          | 2 (1.4)         | 2 (4.9)        |
|                                                                                                                                        |                        | 7 or more times in a usual day | 0 (0.0)          | 0 (0.0)         | 0 (0.0)        |
|                                                                                                                                        |                        | Do not know or no response     | 1 (0.7)          | 0 (0.0)         | 0 (0.0)        |
| 2                                                                                                                                      | 60                     | 0 times in a usual day         | 83 (55.7)        | 85 (57.4)       | 22 (53.7)      |
|                                                                                                                                        |                        | 1 time in a usual day          | 44 (29.5)        | 44 (29.7)       | 14 (34.1)      |
|                                                                                                                                        |                        | 2 to 3 times in a usual day    | 19 (12.8)        | 19 (12.8)       | 5 (12.2)       |
|                                                                                                                                        |                        | 4 to 6 times in a usual day    | 3 (2.0)          | 0 (0.0)         | 0 (0.0)        |
|                                                                                                                                        |                        | 7 or more times in a usual day | 0 (0.0)          | 0 (0.0)         | 0 (0.0)        |
|                                                                                                                                        |                        | Do not know or no response     | 0 (0.0)          | 0 (0.0)         | 0 (0.0)        |
| 3                                                                                                                                      | 90                     | 0 times in a usual day         | 91 (61.1)        | 82 (55.4)       | 17 (41.5)      |
|                                                                                                                                        |                        | 1 time in a usual day          | 32 (21.5)        | 41 (27.7)       | 19 (46.3)      |
|                                                                                                                                        |                        | 2 to 3 times in a usual day    | 23 (15.4)        | 24 (16.2)       | 4 (9.8)        |
|                                                                                                                                        |                        | 4 to 6 times in a usual day    | 3 (2.0)          | 1 (0.7)         | 0 (0.0)        |
|                                                                                                                                        |                        | 7 or more times in a usual day | 0 (0.0)          | 0 (0.0)         | 0 (0.0)        |
|                                                                                                                                        |                        | Do not know or no response     | 0 (0.0)          | 0 (0.0)         | 1 (2.4)        |
| 4                                                                                                                                      | 120                    | 0 times in a usual day         | 113 (75.8)       | 117 (79.1)      | 27 (65.9)      |
|                                                                                                                                        |                        | 1 time in a usual day          | 30 (20.1)        | 25 (16.9)       | 12 (29.3)      |
|                                                                                                                                        |                        | 2 to 3 times in a usual day    | 4 (2.7)          | 6 (4.1)         | 2 (4.9)        |
|                                                                                                                                        |                        | 4 to 6 times in a usual day    | 1 (0.7)          | 0 (0.0)         | 0 (0.0)        |
|                                                                                                                                        |                        | 7 or more times in a usual day | 0 (0.0)          | 0 (0.0)         | 0 (0.0)        |
|                                                                                                                                        |                        | Do not know or no response     | 1 (0.7)          | 0 (0.0)         | 0 (0.0)        |
| No. 7: Frequency of crying: „Thinking about the past week, how much total time did your baby usually cry in a day?“                    |                        |                                |                  |                 |                |
| 1                                                                                                                                      | 30                     | Less than 10 minutes in a day  | 29 (19.5)        | 27 (18.2)       | 10 (24.4)      |
|                                                                                                                                        |                        | 10 to 30 minutes in a day      | 52 (34.9)        | 60 (40.5)       | 11 (26.8)      |
|                                                                                                                                        |                        | 30 minutes to 1 hour in a day  | 39 (26.2)        | 33 (22.3)       | 8 (19.5)       |
|                                                                                                                                        |                        | 1 to 2 hours in a day          | 22 (14.8)        | 19 (12.8)       | 7 (17.1)       |
|                                                                                                                                        |                        | 2 or more hours in a day       | 3 (2.0)          | 6 (4.1)         | 3 (7.3)        |
|                                                                                                                                        |                        | Do not know or no response     | 4 (2.7)          | 3 (2.0)         | 2 (4.9)        |
| 2                                                                                                                                      | 60                     | Less than 10 minutes in a day  | 37 (24.8)        | 45 (30.4)       | 14 (34.1)      |
|                                                                                                                                        |                        | 10 to 30 minutes in a day      | 42 (28.2)        | 47 (31.8)       | 11 (26.8)      |
|                                                                                                                                        |                        | 30 minutes to 1 hour in a day  | 50 (33.6)        | 37 (25.0)       | 13 (31.7)      |
|                                                                                                                                        |                        | 1 to 2 hours in a day          | 17 (11.4)        | 17 (11.5)       | 2 (4.9)        |
|                                                                                                                                        |                        | 2 or more hours in a day       | 2 (1.3)          | 1 (0.7)         | 0 (0.0)        |
|                                                                                                                                        |                        | Do not know or no response     | 1 (0.7)          | 1 (0.7)         | 1 (2.4)        |
| 3                                                                                                                                      | 90                     | Less than 10 minutes in a day  | 49 (32.9)        | 48 (32.4)       | 14 (34.1)      |
|                                                                                                                                        |                        | 10 to 30 minutes in a day      | 43 (28.9)        | 46 (31.1)       | 16 (39.0)      |
|                                                                                                                                        |                        | 30 minutes to 1 hour in a day  | 38 (25.5)        | 38 (25.7)       | 11 (26.8)      |
|                                                                                                                                        |                        | 1 to 2 hours in a day          | 19 (12.8)        | 15 (10.1)       | 0 (0.0)        |
|                                                                                                                                        |                        | 2 or more hours in a day       | 0 (0.0)          | 0 (0.0)         | 0 (0.0)        |
|                                                                                                                                        |                        | Do not know or no response     | 0 (0.0)          | 1 (0.7)         | 0 (0.0)        |

| Visit | Age at Visit<br>(Days) |                               | eHF<br>(n = 149) | CF<br>(n = 148) | BF<br>(n = 41) |
|-------|------------------------|-------------------------------|------------------|-----------------|----------------|
| 4     | 120                    | Less than 10 minutes in a day | 68 (45.6)        | 72 (48.6)       | 21 (51.2)      |
|       |                        | 10 to 30 minutes in a day     | 38 (25.5)        | 41 (27.7)       | 5 (12.2)       |
|       |                        | 30 minutes to 1 hour in a day | 31 (20.8)        | 22 (14.9)       | 9 (22.0)       |
|       |                        | 1 to 2 hours in a day         | 11 (7.4)         | 12 (8.1)        | 5 (12.2)       |
|       |                        | 2 or more hours in a day      | 0 (0.0)          | 0 (0.0)         | 0 (0.0)        |
|       |                        | Do not know or no response    | 1 (0.7)          | 1 (0.7)         | 1 (2.4)        |

No. 9: Frequency of crying during or right after feeding: "Thinking about the past week, how many times did your baby cry during or right after a feeding because the milk bothered your baby?"

|   |     |                             |            |            |           |
|---|-----|-----------------------------|------------|------------|-----------|
| 1 | 30  | 0 times in the week         | 88 (59.1)  | 89 (60.1)  | 21 (51.2) |
|   |     | 1 time in the week          | 39 (26.2)  | 40 (27.0)  | 13 (31.7) |
|   |     | 2 times in the week         | 14 (9.4)   | 10 (6.8)   | 3 (7.3)   |
|   |     | 3 times in the week         | 2 (1.3)    | 4 (2.7)    | 1 (2.4)   |
|   |     | 4 or more times in the week | 0 (0.0)    | 1 (0.7)    | 0 (0.0)   |
|   |     | Do not know or no response  | 6 (4.0)    | 4 (2.7)    | 3 (7.3)   |
| 2 | 60  | 0 times in the week         | 83 (55.7)  | 89 (60.1)  | 22 (53.7) |
|   |     | 1 time in the week          | 40 (26.8)  | 34 (23.0)  | 11 (26.8) |
|   |     | 2 times in the week         | 21 (14.1)  | 20 (13.5)  | 7 (17.1)  |
|   |     | 3 times in the week         | 3 (2.0)    | 4 (2.7)    | 1 (2.4)   |
|   |     | 4 or more times in the week | 1 (0.7)    | 0 (0.0)    | 0 (0.0)   |
|   |     | Do not know or no response  | 1 (0.7)    | 1 (0.7)    | 0 (0.0)   |
| 3 | 90  | 0 times in the week         | 93 (62.4)  | 93 (62.8)  | 19 (46.3) |
|   |     | 1 time in the week          | 43 (28.9)  | 42 (28.4)  | 11 (26.8) |
|   |     | 2 times in the week         | 10 (6.7)   | 11 (7.4)   | 11 (26.8) |
|   |     | 3 times in the week         | 2 (1.3)    | 2 (1.4)    | 0 (0.0)   |
|   |     | 4 or more times in the week | 0 (0.0)    | 0 (0.0)    | 0 (0.0)   |
|   |     | Do not know or no response  | 1 (0.7)    | 0 (0.0)    | 0 (0.0)   |
| 4 | 120 | 0 times in the week         | 104 (69.8) | 105 (70.9) | 18 (43.9) |
|   |     | 1 time in the week          | 40 (26.8)  | 32 (21.6)  | 17 (41.5) |
|   |     | 2 times in the week         | 2 (1.3)    | 9 (6.1)    | 3 (7.3)   |
|   |     | 3 times in the week         | 1 (0.7)    | 0 (0.0)    | 1 (2.4)   |
|   |     | 4 or more times in the week | 0 (0.0)    | 1 (0.7)    | 0 (0.0)   |
|   |     | Do not know or no response  | 2 (1.3)    | 1 (0.7)    | 2 (4.9)   |

No. 10: Frequency of feeling fussy: "Thinking about the past week, on how many days was your baby fussy?"

|   |    |                |            |            |           |
|---|----|----------------|------------|------------|-----------|
| 1 | 30 | 0 day          | 82 (55.0)  | 85 (57.4)  | 27 (65.9) |
|   |    | 1 day          | 26 (17.4)  | 22 (14.9)  | 7 (17.1)  |
|   |    | 2 or 3 days    | 39 (26.2)  | 38 (25.7)  | 7 (17.1)  |
|   |    | 4 or 5 days    | 2 (1.3)    | 3 (2.0)    | 0 (0.0)   |
|   |    | 6 or more days | 0 (0.0)    | 0 (0.0)    | 0 (0.0)   |
| 2 | 60 | 0 day          | 92 (61.7)  | 99 (66.9)  | 26 (63.4) |
|   |    | 1 day          | 20 (13.4)  | 16 (10.8)  | 7 (17.1)  |
|   |    | 2 or 3 days    | 37 (24.8)  | 33 (22.3)  | 8 (19.5)  |
|   |    | 4 or 5 days    | 0 (0.0)    | 0 (0.0)    | 0 (0.0)   |
|   |    | 6 or more days | 0 (0.0)    | 0 (0.0)    | 0 (0.0)   |
| 3 | 90 | 0 day          | 101 (67.8) | 105 (70.9) | 24 (58.5) |
|   |    | 1 day          | 30 (20.1)  | 27 (18.2)  | 8 (19.5)  |
|   |    | 2 or 3 days    | 18 (12.1)  | 16 (10.8)  | 9 (22.0)  |
|   |    | 4 or 5 days    | 0 (0.0)    | 0 (0.0)    | 0 (0.0)   |
|   |    | 6 or more days | 0 (0.0)    | 0 (0.0)    | 0 (0.0)   |

| Visit                                                                                                               | Age at Visit<br>(Days) |                                | eHF<br>(n = 149) | CF<br>(n = 148) | BF<br>(n = 41) |
|---------------------------------------------------------------------------------------------------------------------|------------------------|--------------------------------|------------------|-----------------|----------------|
| 4                                                                                                                   | 120                    | 0 day                          | 114 (76.5)       | 115 (77.7)      | 24 (58.5)      |
|                                                                                                                     |                        | 1 day                          | 21 (14.1)        | 14 (9.5)        | 13 (31.7)      |
|                                                                                                                     |                        | 2 or 3 days                    | 14 (9.4)         | 19 (12.8)       | 4 (9.8)        |
|                                                                                                                     |                        | 4 or 5 days                    | 0 (0.0)          | 0 (0.0)         | 0 (0.0)        |
|                                                                                                                     |                        | 6 or more days                 | 0 (0.0)          | 0 (0.0)         | 0 (0.0)        |
| No. 12: Frequency of flatulence: "Thinking about the past week, how many times in a usual day was your baby gassy?" |                        |                                |                  |                 |                |
| 1                                                                                                                   | 30                     | 0 times in a usual day         | 14 (9.4)         | 22 (14.9)       | 3 (7.3)        |
|                                                                                                                     |                        | 1 time in a usual day          | 40 (26.8)        | 47 (31.8)       | 20 (48.8)      |
|                                                                                                                     |                        | 2 to 3 times in a usual day    | 63 (42.3)        | 52 (35.1)       | 16 (39.0)      |
|                                                                                                                     |                        | 4 to 6 times in a usual day    | 25 (16.8)        | 20 (13.5)       | 1 (2.4)        |
|                                                                                                                     |                        | 7 or more times in a usual day | 4 (2.7)          | 5 (3.4)         | 0 (0.0)        |
|                                                                                                                     |                        | Do not know or no response     | 3 (2.0)          | 2 (1.4)         | 1 (2.4)        |
| 2                                                                                                                   | 60                     | 0 times in a usual day         | 33 (22.1)        | 35 (23.6)       | 13 (31.7)      |
|                                                                                                                     |                        | 1 time in a usual day          | 50 (33.6)        | 64 (43.2)       | 17 (41.5)      |
|                                                                                                                     |                        | 2 to 3 times in a usual day    | 48 (32.2)        | 36 (24.3)       | 11 (26.8)      |
|                                                                                                                     |                        | 4 to 6 times in a usual day    | 14 (9.4)         | 8 (5.4)         | 0 (0.0)        |
|                                                                                                                     |                        | 7 or more times in a usual day | 4 (2.7)          | 4 (2.7)         | 0 (0.0)        |
|                                                                                                                     |                        | Do not know or no response     | 0 (0.0)          | 1 (0.7)         | 0 (0.0)        |
| 3                                                                                                                   | 90                     | 0 times in a usual day         | 56 (37.6)        | 58 (39.2)       | 21 (51.2)      |
|                                                                                                                     |                        | 1 time in a usual day          | 55 (36.9)        | 60 (40.5)       | 19 (46.3)      |
|                                                                                                                     |                        | 2 to 3 times in a usual day    | 27 (18.1)        | 23 (15.5)       | 1 (2.4)        |
|                                                                                                                     |                        | 4 to 6 times in a usual day    | 9 (6.0)          | 7 (4.7)         | 0 (0.0)        |
|                                                                                                                     |                        | 7 or more times in a usual day | 2 (1.3)          | 0 (0.0)         | 0 (0.0)        |
|                                                                                                                     |                        | Do not know or no response     | 0 (0.0)          | 0 (0.0)         | 0 (0.0)        |
| 4                                                                                                                   | 120                    | 0 times in a usual day         | 89 (59.7)        | 90 (60.8)       | 24 (58.5)      |
|                                                                                                                     |                        | 1 time in a usual day          | 31 (20.8)        | 33 (22.3)       | 16 (39.0)      |
|                                                                                                                     |                        | 2 to 3 times in a usual day    | 19 (12.8)        | 15 (10.1)       | 1 (2.4)        |
|                                                                                                                     |                        | 4 to 6 times in a usual day    | 8 (5.4)          | 7 (4.7)         | 0 (0.0)        |
|                                                                                                                     |                        | 7 or more times in a usual day | 1 (0.7)          | 1 (0.7)         | 0 (0.0)        |
|                                                                                                                     |                        | Do not know or no response     | 1 (0.7)          | 2 (1.4)         | 0 (0.0)        |

Values presented as *n* (%). No missing values.

The statistical analysis with a logistic ordinal mixed model for repeated measurements showed a significant effect of visit on all individual questions ( $p < 0.001$ ).

BF: breastfed group; CF: control formula; eHF: infant formula manufactured from extensively hydrolysed whey protein; *n*: number of observations; No.: number; PPS: per protocol set

Table S2. Comparison of IGSQ 13-item total score (a.u., range 13-65) by visit in the subgroup of infants who did not take GI tolerance medications (linear mixed model for repeated measurements) (PPS)

| Visit | Group         | N   | LSM   | SEM    | 95% confidence interval (2-sided) | Two-sided superiority p value |
|-------|---------------|-----|-------|--------|-----------------------------------|-------------------------------|
| 2     | eHF           | 109 | 22.62 | 1.0169 | [20.51;24.73]                     | 0.4679                        |
|       | CF            | 105 | 22.02 | 1.0304 | [19.89;24.15]                     |                               |
|       | eHF vs CF     |     | 0.60  | 0.8198 | [-1.02;2.21]                      |                               |
| 3     | eHF           | 109 | 21.07 | 0.9315 | [19.09;23.05]                     | 0.4843                        |
|       | CF            | 105 | 20.67 | 0.9429 | [18.66;22.67]                     |                               |
|       | eHF vs CF     |     | 0.40  | 0.5770 | [-0.73;1.54]                      |                               |
| 4     | eHF           | 108 | 17.46 | 0.9465 | [15.46;19.46]                     | 0.6326                        |
|       | CF            | 105 | 17.76 | 0.9575 | [15.74;19.78]                     |                               |
|       | eHF vs CF     |     | -0.30 | 0.6241 | [-1.53;0.93]                      |                               |
|       | Product       |     |       |        |                                   | 0.5683                        |
|       | Visit         |     |       |        |                                   | <0.0001                       |
|       | Sex           |     |       |        |                                   | 0.5818                        |
|       | Product*Visit |     |       |        |                                   | 0.6166                        |

Missing values in eHF: V4:  $n = 1$ ; V2:  $n = 1$ .

a.u.: arbitrary units; BF: breastfed group; CF: control formula; eHF: infant formula manufactured from extensively hydrolysed whey protein; GI: gastrointestinal; IGSQ: Infant Gastrointestinal Symptoms Questionnaire; LSM: least square means; N: number of observations; PPS: per protocol set; SEM: standard error of mean

Table S3. Comparison of IGSQ 13-item total score (a.u., range 13-65) between the two subgroups of infants who did or did not receive GI tolerance medication (three-way interaction term with infant formula group, visit, and subgroup in linear mixed model for repeated measurements) (PPS)

| Visit                                 | GI tolerance medication | Group | N   | LSM   | SEM    | 95% confidence interval (2-sided) | Two-sided superiority p value |
|---------------------------------------|-------------------------|-------|-----|-------|--------|-----------------------------------|-------------------------------|
| 2                                     | Yes                     | eHF   | 149 | 23.56 | 1.2803 | [20.99;26.12]                     |                               |
|                                       |                         | CF    | 147 | 23.34 | 1.2623 | [20.81;25.87]                     |                               |
|                                       | No                      | eHF   | 149 | 22.71 | 0.9958 | [20.64;24.77]                     |                               |
|                                       |                         | CF    | 147 | 22.10 | 1.0091 | [20.01;24.19]                     |                               |
| 3                                     | Yes                     | eHF   | 149 | 20.79 | 1.1221 | [18.51;23.07]                     |                               |
|                                       |                         | CF    | 148 | 21.24 | 1.1042 | [18.99;23.49]                     |                               |
|                                       | No                      | eHF   | 149 | 21.16 | 0.9230 | [19.21;23.12]                     |                               |
|                                       |                         | CF    | 148 | 20.75 | 0.9346 | [18.77;22.72]                     |                               |
| 4                                     | Yes                     | eHF   | 148 | 17.14 | 1.1037 | [14.89;19.39]                     |                               |
|                                       |                         | CF    | 148 | 16.68 | 1.0868 | [14.46;18.90]                     |                               |
|                                       | No                      | eHF   | 148 | 17.56 | 0.9155 | [15.61;19.50]                     |                               |
|                                       |                         | CF    | 148 | 17.84 | 0.9263 | [15.88;19.80]                     |                               |
| Product                               |                         |       |     |       |        |                                   | 0.6725                        |
| Visit                                 |                         |       |     |       |        |                                   | <0.0001                       |
| Sex                                   |                         |       |     |       |        |                                   | 0.7713                        |
| GI tolerance medication               |                         |       |     |       |        |                                   | 0.8097                        |
| Product*Visit                         |                         |       |     |       |        |                                   | 0.8965                        |
| Visit*GI tolerance medication         |                         |       |     |       |        |                                   | 0.1726                        |
| Product*GI tolerance medication       |                         |       |     |       |        |                                   | 0.8222                        |
| Product*Visit*GI tolerance medication |                         |       |     |       |        |                                   | 0.5689                        |

Missing values in subgroup of infants who did not take GI tolerance medications: in eHF: V4:  $n = 1$ :

V2:  $n = 1$ . Missing values in subgroup infants who did take GI tolerance medications: in CF: V2,  $n=1$ .

a.u.: arbitrary units; BF: breastfed group; CF: control formula; eHF: infant formula manufactured from extensively hydrolysed whey protein; GI: gastrointestinal; IGSQ: Infant Gastrointestinal Symptoms Questionnaire; LSM: least square means; N: number of observations; PPS: per protocol set; SEM: standard error of mean

Table S4. Mean duration of uninterrupted nocturnal sleep (hours/night) and mean daily time to fall asleep (hours/day) from 3-day diary (PPS)

| Visit | Age at visit (days) | Uninterrupted nocturnal sleep |                           |                          | Time to fall asleep      |                          |                          |
|-------|---------------------|-------------------------------|---------------------------|--------------------------|--------------------------|--------------------------|--------------------------|
|       |                     | eHF ( <i>n</i> = 149)         | CF ( <i>n</i> = 148)      | BF ( <i>n</i> = 41)      | eHF ( <i>n</i> = 149)    | CF ( <i>n</i> = 148)     | BF ( <i>n</i> = 41)      |
| 1     | 30                  | 4.5 (1.5)<br>(1.3 ; 9.0)      | 4.6 (1.5)<br>(1.3 ; 8.3)  | 4.0 (1.8)<br>(1.6 ; 6.4) | 0.8 (0.4)<br>(0.0 ; 1.8) | 0.8 (0.4)<br>(0.1 ; 3.0) | 0.9 (0.4)<br>(0.3 ; 2.2) |
| 2     | 60                  | 5.0 (1.6)<br>(1.5 ; 9.0)      | 5.0 (1.6)<br>(1.8 ; 8.5)  | 4.7 (1.6)<br>(1.7 ; 6.9) | 0.7 (0.3)<br>(0.1 ; 1.8) | 0.7 (0.3)<br>(0.1 ; 1.7) | 0.8 (0.3)<br>(0.2 ; 1.4) |
| 3     | 90                  | 5.6 (1.8)<br>(1.5 ; 12.3)     | 5.6 (1.7)<br>(1.8 ; 9.4)  | 5.8 (1.8)<br>(1.8 ; 8.2) | 0.7 (0.3)<br>(0.0 ; 1.5) | 0.7 (0.3)<br>(0.2 ; 1.8) | 0.8 (0.5)<br>(0.2 ; 3.3) |
| 4     | 120                 | 6.1 (1.4)<br>(1.5 ; 10.0)     | 6.1 (1.6)<br>(1.8 ; 11.1) | 6.2 (1.1)<br>(3.2 ; 8.3) | 0.5 (0.2)<br>(0.2 ; 1.5) | 0.5 (0.2)<br>(0.1 ; 1.1) | 0.5 (0.2)<br>(0.1 ; 0.9) |

Values presented as mean (SD), (min ; max)

Missing values in CF for mean daily time to fall asleep: V1: *n* = 1; V2: *n* = 1

BF: breastfed group; CF: control formula; eHF: infant formula manufactured from extensively hydrolysed whey protein; *n*: number of observations; max: maximum; min: minimum; PPS: per protocol set; SD: standard deviation
